# Supplementary material for: Prevalence of depression and anxiety in people with inflammatory bowel disease and associated healthcare use: population-based cohort study
Source: HighWire-hosted journal article supplement (doi:10.1136/ebmental-2020-300223), 2021-03-30
Supplement: ebmental-2020-300223supp001_data_supplement.pdf [file ebmental-2020-300223supp001_data_supplement.pdf]

**Supplementary material for:**

**The prevalence of depression and anxiety in people with inflammatory bowel disease and associated healthcare use: population-based cohort study**

**Authors:** Peter Irving, Kevin Barrett, Monica Nijher, Simon de Lusignan

sTable 1: Read codes used to identify inflammatory bowel disease

| Ulcerative colitis |         |                                                    |
|--------------------|---------|----------------------------------------------------|
| Read V2 Code       | Term ID | Description                                        |
| J41..              | All     | Ulcerative colitis and/or proctitis                |
| J410.              | All     | Ulcerative proctocolitis                           |
| J4100              | All     | Ulcerative ileocolitis                             |
| J4101              | All     | Ulcerative colitis                                 |
| J4102              | All     | Ulcerative rectosigmoiditis                        |
| J4103              | All     | Ulcerative proctitis                               |
| J4104              | All     | Exacerbation of ulcerative colitis                 |
| J410z              | All     | Ulcerative proctocolitis NOS                       |
| J411.              | All     | Ulcerative (chronic) enterocolitis                 |
| J412.              | All     | Ulcerative (chronic) ileocolitis                   |
| J413.              | All     | Ulcerative pancolitis                              |
| N0454              | All     | Juvenile arthritis in ulcerative colitis           |
| N0310              | All     | Arthropathy in ulcerative colitis                  |
| Read CTV3 Code     | Term ID | Description                                        |
| XE0ag              | All     | Ulcerative colitis                                 |
| XaZ2j              | All     | Left sided ulcerative colitis                      |
| XaYzX              | All     | Ulcerative pancolitis                              |
| XaK6E              | All     | Exacerbation of ulcerative colitis                 |
| J410.              | All     | Ulcerative proctocolitis                           |
| J4100              | All     | Ulcerative ileocolitis                             |
| J410z              | All     | Ulcerative proctocolitis NOS                       |
| Jyu41              | All     | [X]Other ulcerative colitis                        |
| Crohn's disease    |         |                                                    |
| Read V2 Code       | Term ID | Description                                        |
| J40..              | All     | Regional enteritis- Crohn's disease                |
| J400.              | All     | Regional enteritis of the small bowel              |
| J4002              | All     | Crohn's disease of the terminal ileum              |
| J4003              | All     | Crohn's disease of the ileum unspecified           |
| J4004              | All     | Crohn's disease of the ileum NOS                   |
| J4005              | All     | Exacerbation of Crohn's disease of small intestine |
| J400z              | All     | Crohn's disease of the small bowel NOS             |
| J40..              | All     | Crohn's disease                                    |
| J4012              | All     | Exacerbation of Crohn's disease of large intestine |
| J401z              | All     | Crohn's disease of the large bowel NOS             |
| J402.              | All     | Regional ileocolitis                               |
| J40z.              | All     | Crohn's disease NOS                                |
| Read CTV3 Code     | Term ID | Description                                        |
| XE2QL              | All     | Crohn's disease                                    |
| Xa0lh              | All     | Regional enteritis                                 |
| X302r              | All     | Crohn's jejunitis                                  |
| X302t              | All     | Crohn's ileitis                                    |

|       |     |                                                    |
|-------|-----|----------------------------------------------------|
| J4003 | All | Crohn's disease of the ileum unspecified           |
| J4004 | All | Crohn's disease of the ileum NOS                   |
| J4002 | All | Crohn's disease of terminal ileum                  |
| J400. | All | Regional enteritis of small bowel                  |
| XaK6C | All | Exacerbation of Crohn's disease of small intestine |
| J400z | All | Crohn's disease of the small bowel NOS             |
| J401. | All | Regional enteritis of the large bowel              |
| XE0af | All | Crohn's disease of the large bowel NOS             |
| XaK6D | All | Exacerbation of Crohn's disease of large intestine |
| J40z. | All | Regional enteritis NOS                             |
| J4010 | All | Crohn's colitis                                    |
| J4011 | All | Crohn's proctitis                                  |
| X3050 | All | Perianal Crohn's disease                           |
| Jyu40 | All | [X]Other Crohn's disease                           |

**sTable 2. Algorithms used to identify anxiety episodes, depression episodes, and recurrent major depression. Expressions in capitals equate to Boolean expressions.**

| Clinical entity               | ICD 10 code | Definition                                                                                                                         |
|-------------------------------|-------------|------------------------------------------------------------------------------------------------------------------------------------|
| Anxiety                       | F41         | Any coded anxiety episode AND concurrent treatment for anxiety                                                                     |
| Depressive episode            | F32         | Any coded depressive episode AND concurrent treatment for depression                                                               |
| Recurrent depressive disorder | F33         | (Any historical code* for a depressive episode AND current treatment for depression) OR Any code for recurrent depressive disorder |
| Anxiety treatments**          | NA          | SSRIs, anxiolytics, counselling, CBT, and psychotherapy                                                                            |
| Depression treatments         | NA          | SSRIs, TCAs, MAOIs, counselling, CBT, and psychotherapy                                                                            |

\*More than 1 year ago. SSRIs = selective serotonin reuptake inhibitors, TCA = tricyclic antidepressants, MAOI = monoamine oxidase inhibitors, CBT = cognitive behavioural therapy. \*\* TCS were not included in the list of anxiety treatments used for case finding. Whilst they are indicated for use in anxiety this indication makes up only a small proportion of TCA prescribing (<https://doi.org/10.1136/bmj.j603>). TCAs are also prescribed in people with functional gastrointestinal disorders which are more common in people with IBD. We therefore did not consider TCA prescriptions specific enough for this purpose.

Supplementary table S3. Read codes used to identify anxiety episodes.

| Read V2 Code   | Term ID | Description                                     |
|----------------|---------|-------------------------------------------------|
| E200.          | All     | Anxiety states                                  |
| E2000          | All     | Anxiety state unspecified                       |
| E2001          | All     | Panic disorder                                  |
| E2002          | All     | Generalised anxiety disorder                    |
| E2003          | All     | Anxiety with depression                         |
| E2004          | All     | Chronic anxiety                                 |
| E2005          | All     | Recurrent anxiety                               |
| E200z          | All     | Anxiety state NOS                               |
| Eu41.          | All     | [X]Other anxiety disorders                      |
| Eu410          | All     | [X]Panic disorder [episodic paroxysmal anxiety] |
| Eu411          | All     | [X]Generalized anxiety disorder                 |
| Eu412          | All     | [X]Mixed anxiety and depressive disorder        |
| Eu413          | All     | [X]Other mixed anxiety disorders                |
| Eu41y          | All     | [X]Other specified anxiety disorders            |
| Eu41z          | All     | [X]Anxiety disorder, unspecified                |
| Read CTV3 Code | Term ID | Description                                     |
| E200.          | All     | Anxiety disorder                                |
| XE1Y7          | All     | Panic disorder                                  |
| Eu410          | All     | [X]Panic disorder [episodic paroxysmal anxiety] |
| E2002          | All     | Generalised anxiety disorder                    |
| X00Sb          | All     | Mixed anxiety and depressive disorder           |
| X00RP          | All     | Organic anxiety disorder                        |
| E2004          | All     | Chronic anxiety                                 |
| E2005          | All     | Recurrent anxiety                               |
| E200z          | All     | Anxiety state NOS                               |
| X00Sc          | All     | Anxiety hysteria                                |
| Eu41.          | All     | [X]Other anxiety disorders                      |
| Eu413          | All     | [X]Other mixed anxiety disorders                |
| Eu41z          | All     | [X]Anxiety disorder, unspecified                |
| XE1Zj          | All     | [X]Other specified anxiety disorders            |

sTable 4. Read codes used to identify depression episodes.

| Read V2 Code | Term ID | Description                                                               |
|--------------|---------|---------------------------------------------------------------------------|
| E0013        | All     | Presenile dementia with depression                                        |
| E0021        | All     | Senile dementia with depression                                           |
| E112.        | All     | Single major depressive episode                                           |
| E1120        | All     | Single major depressive episode, unspecified                              |
| E1121        | All     | Single major depressive episode, mild                                     |
| E1122        | All     | Single major depressive episode, moderate                                 |
| E1123        | All     | Single major depressive episode, severe, without mention of psychosis     |
| E1124        | All     | Single major depressive episode, severe, with psychosis                   |
| E1125        | All     | Single major depressive episode, in partial or unspecified remission      |
| E1126        | All     | Single major depressive episode, in full remission                        |
| E112z        | All     | Single major depressive episode NOS                                       |
| E113.        | All     | Recurrent major depressive episode                                        |
| E1130        | All     | Recurrent major depressive episodes, unspecified                          |
| E1131        | All     | Recurrent major depressive episodes, mild                                 |
| E1132        | All     | Recurrent major depressive episodes, moderate                             |
| E1133        | All     | Recurrent major depressive episodes, severe, without mention of psychosis |
| E1134        | All     | Recurrent major depressive episodes, severe, with psychosis               |
| E1137        | All     | Recurrent depression                                                      |
| E113z        | All     | Recurrent major depressive episode NOS                                    |
| E118.        | All     | Seasonal affective disorder                                               |
| E11y2        | All     | Atypical depressive disorder                                              |
| E11z2        | All     | Masked depression                                                         |
| E130.        | All     | Reactive depressive psychosis                                             |
| E135.        | All     | Agitated depression                                                       |
| E2003        | All     | Anxiety with depression                                                   |
| E291.        | All     | Prolonged depressive reaction                                             |
| E2B..        | All     | Depressive disorder NEC                                                   |
| E2B1.        | All     | Chronic depression                                                        |
| E2B0.        | All     | Postviral depression                                                      |
| Eu204        | All     | [X]Post-schizophrenic depression                                          |
| Eu251        | All     | [X]Schizoaffective disorder, depressive type                              |
| Eu32.        | All     | [X]Depressive episode                                                     |
| Eu320        | All     | [X]Mild depressive episode                                                |
| Eu321        | All     | [X]Moderate depressive episode                                            |
| Eu322        | All     | [X]Severe depressive episode without psychotic symptoms                   |
| Eu323        | All     | [X]Severe depressive episode with psychotic symptoms                      |
| Eu324        | All     | [X]Mild depression                                                        |
| Eu325        | All     | [X]Major depression, mild                                                 |
| Eu326        | All     | [X]Major depression, moderately severe                                    |
| Eu327        | All     | [X]Major depression, severe without psychotic symptoms                    |
| Eu328        | All     | [X]Major depression, severe with psychotic symptoms                       |
| Eu32y        | All     | [X]Other depressive episodes                                              |

|                       |                |                                                                                     |
|-----------------------|----------------|-------------------------------------------------------------------------------------|
| Eu32z                 | All            | [X]Depressive episode, unspecified                                                  |
| Eu33.                 | All            | [X]Recurrent depressive disorder                                                    |
| Eu330                 | All            | [X]Recurrent depressive disorder, current episode mild                              |
| Eu331                 | All            | [X]Recurrent depressive disorder, current episode moderate                          |
| Eu332                 | All            | [X]Recurrent depressive disorder, current episode severe without psychotic symptoms |
| Eu333                 | All            | [X]Recurrent depressive disorder, current episode severe with psychotic symptoms    |
| Eu334                 | All            | [X]Recurrent depressive disorder, currently in remission                            |
| Eu33y                 | All            | [X]Other recurrent depressive disorders                                             |
| Eu33z                 | All            | [X]Recurrent depressive disorder, unspecified                                       |
| Eu412                 | All            | [X]Mixed anxiety and depressive disorder                                            |
| <b>Read CTV3 Code</b> | <b>Term ID</b> | <b>Description</b>                                                                  |
| X00Sb                 | All            | Mixed anxiety and depressive disorder                                               |
| X00SO                 | All            | Depressive disorder                                                                 |
| X761L                 | All            | Seasonal affective disorder                                                         |
| Xa0wV                 | All            | Recurrent brief depressive disorder                                                 |
| X00SQ                 | All            | Agitated depression                                                                 |
| XE1YC                 | All            | Reactive depression                                                                 |
| X00SR                 | All            | Endogenous depression                                                               |
| X00SS                 | All            | Endogenous depression first episode                                                 |
| XE1Y0                 | All            | Single major depressive episode                                                     |
| E1120                 | All            | Single major depressive episode, unspecified                                        |
| E1120                 | All            | Single major depressive episode, unspecified                                        |
| E1121                 | All            | Single major depressive episode, mild                                               |
| E1122                 | All            | Single major depressive episode, moderate                                           |
| E1123                 | All            | Single major depressive episode, severe, without mention of psychosis               |
| E1124                 | All            | Single major depressive episode, severe, with psychosis                             |
| XaX53                 | All            | Single major depressive episode, severe, with psychosis, psychosis in remission     |
| E1125                 | All            | Single major depressive episode, in partial or unspecified remission                |
| E1126                 | All            | Single major depressive episode, in full remission                                  |
| E112z                 | All            | Single major depressive episode NOS                                                 |
| XM1GC                 | All            | Endogenous depression - recurrent                                                   |
| E1130                 | All            | Recurrent major depressive episodes, unspecified                                    |
| E1131                 | All            | Recurrent major depressive episodes, mild                                           |
| E1132                 | All            | Recurrent major depressive episodes, moderate                                       |
| E1133                 | All            | Recurrent major depressive episodes, severe, without mention of psychosis           |
| E1134                 | All            | Recurrent major depressive episodes, severe, with psychosis                         |
| E1135                 | All            | Recurrent major depressive episodes, in partial or unspecified remission            |
| E1136                 | All            | Recurrent major depressive episodes, in full remission                              |
| E113z                 | All            | Recurrent major depressive episode NOS                                              |
| X00SU                 | All            | Masked depression                                                                   |
| E11y2                 | All            | Atypical depressive disorder                                                        |
| X00S8                 | All            | Post-schizophrenic depression                                                       |
| XSEGI                 | All            | Major depressive disorder                                                           |
| XSKr7                 | All            | Cotard syndrome                                                                     |

|       |     |                                                                                     |
|-------|-----|-------------------------------------------------------------------------------------|
| XSGol | All | Moderate major depression                                                           |
| XSGok | All | Mild major depression                                                               |
| XSGom | All | Severe major depression without psychotic features                                  |
| XSGon | All | Severe major depression with psychotic features                                     |
| E1137 | All | Recurrent depression                                                                |
| E130. | All | Reactive depressive psychosis                                                       |
| E2B.. | All | Depressive disorder NEC                                                             |
| E2B0. | All | Postviral depression                                                                |
| E2B1. | All | Chronic depression                                                                  |
| Eu320 | All | [X]Mild depressive episode                                                          |
| Eu321 | All | [X]Moderate depressive episode                                                      |
| Eu331 | All | [X]Recurrent depressive disorder, current episode moderate                          |
| XE1Y1 | All | Recurrent major depressive episodes                                                 |
| XE1ZY | All | [X]Severe depressive episode without psychotic symptoms                             |
| XE1ZZ | All | [X]Severe depressive episode with psychotic symptoms                                |
| XE1Za | All | [X]Other depressive episodes                                                        |
| XE1Zb | All | [X]Depressive episode, unspecified                                                  |
| XE1Zd | All | [X]Recurrent depressive disorder, current episode severe without psychotic symptoms |
| XE1Ze | All | [X]Recurrent depressive disorder, current episode severe with psychotic symptoms    |
| XE1Zf | All | [X]Recurrent depressive disorder, unspecified                                       |
| XaB9J | All | Depression NOS                                                                      |
| XaCHr | All | [X] Single episode agitated depression without psychotic symptoms                   |
| XaCHs | All | [X] Single episode major depression without psychotic symptoms                      |
| XaCIs | All | Mild depression                                                                     |
| XaCIt | All | Moderate depression                                                                 |
| XaClu | All | Severe depression                                                                   |
| E0013 | All | Presenile dementia with depression                                                  |
| E0021 | All | Senile dementia with depression                                                     |



sTable 5. Read codes used to identify a diagnosis of recurrent major depression.

| Read V2 Code  | Term ID | Description                                                                            |
|---------------|---------|----------------------------------------------------------------------------------------|
| E113.         | All     | Recurrent major depressive episode                                                     |
| E1130         | All     | Recurrent major depressive episodes, unspecified                                       |
| E1131         | All     | Recurrent major depressive episodes, mild                                              |
| E1132         | All     | Recurrent major depressive episodes, moderate                                          |
| E1133         | All     | Recurrent major depressive episodes, severe, without mention of psychosis              |
| E1134         | All     | Recurrent major depressive episodes, severe, with psychosis                            |
| E1135         | All     | Recurrent major depressive episodes, in partial or unspecified remission               |
| E1136         | All     | Recurrent major depressive episodes, in full remission                                 |
| E1137         | All     | Recurrent depression                                                                   |
| E113z         | All     | Recurrent major depressive episode NOS                                                 |
| E2B1.         | All     | Chronic depression                                                                     |
| Eu32A         | All     | [X]Recurrent major depressive episodes, severe, with psychosis, psychosis in remission |
| Eu33.         | All     | [X]Recurrent depressive disorder                                                       |
| Eu330         | All     | [X]Recurrent depressive disorder, current episode mild                                 |
| Eu331         | All     | [X]Recurrent depressive disorder, current episode moderate                             |
| Eu332         | All     | [X]Recurrent depressive disorder, current episode severe without psychotic symptoms    |
| Eu333         | All     | [X]Recurrent depressive disorder, current episode severe with psychotic symptoms       |
| Eu334         | All     | [X]Recurrent depressive disorder, currently in remission                               |
| Eu33y         | All     | [X]Other recurrent depressive disorders                                                |
| Eu33z         | All     | [X]Recurrent depressive disorder, unspecified                                          |
| Read CT3 Code | Term ID | Description                                                                            |
| Xa0wV         | All     | Recurrent brief depressive disorder                                                    |
| XM1GC         | All     | Endogenous depression - recurrent                                                      |
| E1130         | All     | Recurrent major depressive episodes, unspecified                                       |
| E1131         | All     | Recurrent major depressive episodes, mild                                              |
| E1132         | All     | Recurrent major depressive episodes, moderate                                          |
| E1133         | All     | Recurrent major depressive episodes, severe, without mention of psychosis              |
| E1134         | All     | Recurrent major depressive episodes, severe, with psychosis                            |
| XaX54         | All     | Recurrent major depressive episodes, severe, with psychosis, psychosis in remission    |
| E1135         | All     | Recurrent major depressive episodes, in partial or unspecified remission               |
| E1136         | All     | Recurrent major depressive episodes, in full remission                                 |
| E113z         | All     | Recurrent major depressive episode NOS                                                 |
| E1137         | All     | Recurrent depression                                                                   |
| E2B1.         | All     | Chronic depression                                                                     |
| Eu331         | All     | [X]Recurrent depressive disorder, current episode moderate                             |
| XE1Y1         | All     | Recurrent major depressive episodes                                                    |
| XE1Zd         | All     | [X]Recurrent depressive disorder, current episode severe without psychotic symptoms    |
| XE1Ze         | All     | [X]Recurrent depressive disorder, current episode severe with psychotic symptoms       |
| XE1Zf         | All     | [X]Recurrent depressive disorder, unspecified                                          |

sTable 6. Read codes used to identify non-medication based treatments for depression or anxiety.

| <b>Counselling</b>    |                |                                            |
|-----------------------|----------------|--------------------------------------------|
| <b>Read V2 Code</b>   | <b>Term ID</b> | <b>Description</b>                         |
| 67...                 | 11             | Counselling/health education               |
| 671..                 | All            | Counselling - general                      |
| 6712.                 | All            | Counselling offered                        |
| 6714.                 | All            | Counselling carried out                    |
| 6715.                 | All            | Counselling by other agency                |
| 6716.                 | All            | Counselling of benefit                     |
| 6717.                 | All            | Counselling of no benefit                  |
| 671Z.                 | All            | Counselling - general NOS                  |
| 672..                 | All            | Person counselled                          |
| 6721.                 | All            | Patient counselled                         |
| 6722.                 | All            | Family counselled                          |
| 673..                 | All            | Person counselled by                       |
| 6731.                 | All            | Counselled by a doctor                     |
| 6732.                 | All            | Counselled by a nurse                      |
| 6733.                 | All            | Counselled by a health visitor             |
| 6735.                 | All            | Counselled by a social worker              |
| 6736.                 | All            | Counselled by a counsellor                 |
| 6737.                 | All            | Counselled by a vol. worker                |
| 673Z.                 | All            | Counselled by person NOS                   |
| 8M8..                 | All            | Counselling requested                      |
| 9NJ1.                 | All            | In-house counselling                       |
| 9NJR.                 | All            | In-house counselling first appointment     |
| 9NJT.                 | All            | In-house counselling follow-up appointment |
| <b>Read CTV3 Code</b> | <b>Term ID</b> | <b>Description</b>                         |
| X71Ec                 | All            | Counselling                                |
| X71Ep                 | All            | Coping strategy counselling                |
| XaEC1                 | All            | Phobia counselling                         |
| XaD27                 | All            | Family counselling                         |
| 6779.                 | All            | Psychological counselling                  |
| XaECG                 | All            | Anxiety counselling                        |
| XaECF                 | All            | Self-esteem counselling                    |
| XaI8j                 | All            | Stress counselling                         |
| 672..                 | All            | Person counselled                          |
| 6721.                 | All            | Patient counselled                         |
| 6722.                 | All            | Family counselled                          |
| XE1TI                 | All            | Person counselled by                       |
| 6715.                 | All            | Counselling by other agency                |
| 6731.                 | All            | Counselled by a doctor                     |
| 6732.                 | All            | Counselled by a nurse                      |
| 6733.                 | All            | Counselled by a health visitor             |
| 6735.                 | All            | Counselled by a social worker              |

|                                      |                |                                                         |
|--------------------------------------|----------------|---------------------------------------------------------|
| 6736.                                | All            | Counselled by a counsellor                              |
| 6737.                                | All            | Counselled by voluntary worker                          |
| 673Z.                                | All            | Counselled by person NOS                                |
| Xa07L                                | All            | Counselled by member of primary health care team        |
| 9N2B.                                | All            | Seen by counsellor                                      |
| XaAS4                                | All            | Seen by mental health counsellor                        |
| XaBT1                                | All            | Refer to counsellor                                     |
| XaAfJ                                | All            | Referral to mental health counsellor                    |
| 9NJ1.                                | All            | In-house counselling                                    |
| XaLnp                                | All            | In-house counselling first appointment                  |
| XaLnr                                | All            | In-house counselling follow-up appointment              |
| 671..                                | All            | Counselling - general                                   |
| 6712.                                | All            | Counselling offered                                     |
| 6714.                                | All            | Counselling carried out                                 |
| 6716.                                | All            | Counselling of benefit                                  |
| 6717.                                | All            | Counselling of no benefit                               |
| 671Z.                                | All            | Counselling - general NOS                               |
| XaAOd                                | All            | Under care of counsellor                                |
| XaAOh                                | All            | Under care of mental health counsellor                  |
| <b>Cognitive Behavioural Therapy</b> |                |                                                         |
| <b>Read V2 Code</b>                  | <b>Term ID</b> | <b>Description</b>                                      |
| 8G13.                                | All            | Cognitive-behaviour therapy                             |
| 8G130                                | All            | Cognitive behavioural therapy parenting programme       |
| 8G131                                | All            | CBTp - cognitive behavioural therapy for psychosis      |
| 7L1a.                                | All            | Cognitive behavioural therapy                           |
| 7L1a0                                | All            | Cognitive behavioural therapy by unidisciplinary team   |
| 7L1a1                                | All            | Cognitive behavioural therapy by multidisciplinary team |
| 7L1ay                                | All            | Other specified cognitive behavioural therapy           |
| 7L1az                                | All            | Cognitive behavioural therapy NOS                       |
| 8G510                                | All            | Group cognitive behavioural therapy                     |
| 8G15.                                | All            | Computerised cognitive behavioural therapy              |
| 8H1K.                                | All            | Referral for cognitive behavioural therapy              |
| <b>Read CTV3 Code</b>                | <b>Term ID</b> | <b>Description</b>                                      |
| Ub0qp                                | All            | Cognitive and behavioural therapy                       |
| XaABO                                | All            | Cognitive - behaviour therapy                           |
| Xad6J                                | All            | Cognitive behavioural therapy for psychosis             |
| Xaaa6                                | All            | Cognitive behavioural therapy parenting programme       |
| XaQC0                                | All            | Guided self help cognitive behavioural therapy          |
| XaKzQ                                | All            | Computerised cognitive behavioural therapy              |
| Xa8I9                                | All            | Generic cognitive behavioural therapy                   |
| XaM2I                                | All            | Cognitive behavioural therapy by unidisciplinary team   |
| XaM2J                                | All            | Cognitive behavioural therapy by multidisciplinary team |
| XaM2K                                | All            | Other specified cognitive behavioural therapy           |
| XaM2L                                | All            | Cognitive behavioural therapy NOS                       |

|                       |                |                                                                   |
|-----------------------|----------------|-------------------------------------------------------------------|
| XaR2j                 | All            | Referral to cognitive behavioural therapist                       |
| XaR5D                 | All            | Referral for cognitive behavioural therapy                        |
| XaYgB                 | All            | Referral for high intensity cognitive behavioural therapy         |
| <b>Psychotherapy</b>  |                |                                                                   |
| <b>Read V2 Code</b>   | <b>Term ID</b> | <b>Description</b>                                                |
| 8G...                 | All            | Psychotherapy                                                     |
| 8G1..                 | All            | General psychotherapy                                             |
| 8G10.                 | All            | Psychotherapy - behavioural                                       |
| 8G100                 | All            | Behavioural activation therapy                                    |
| 8G101                 | All            | Dialectical behaviour therapy                                     |
| 8G102                 | All            | Behavioural parent training                                       |
| 8G11.                 | All            | Psychotherapy - cognitive                                         |
| 8G12.                 | All            | Psychotherapy - psychodynamic                                     |
| 8G120                 | All            | Short-term psychodynamic therapy                                  |
| 8G121                 | All            | Dynamic interpersonal therapy                                     |
| 8G122                 | All            | Focal psychodynamic therapy                                       |
| 8G14.                 | All            | Cognitive analytic therapy                                        |
| 8G15.                 | All            | Computerised cognitive behavioural therapy                        |
| 8G16.                 | All            | Interpersonal psychotherapy                                       |
| 8G18.                 | All            | Cognitive stimulation therapy                                     |
| 9NIK.                 | All            | Seen by psychotherapist                                           |
| 9NIK0                 | All            | Seen by trainee psychotherapist                                   |
| 8HHT.                 | All            | Referral to psychotherapist                                       |
| ZV57D                 | All            | [V]Psychotherapy, not elsewhere classified                        |
| ZV673                 | All            | [V]Psychotherapy or other treatment for mental disorder follow-up |
| 8G9Z.                 | All            | Other psychotherapy NOS                                           |
| 8G9..                 | All            | Other psychotherapy                                               |
| <b>Read CTV3 Code</b> | <b>Term ID</b> | <b>Description</b>                                                |
| X71bp                 | All            | Psychotherapy                                                     |
| XaaUO                 | All            | Cognitive rehabilitation therapy                                  |
| Xaltc                 | All            | Brief solution focused psychotherapy                              |
| Xa8IG                 | All            | Psychoanalytic and psychodynamic therapy                          |
| Xa8IJ                 | All            | Long-term exploratory psychotherapy                               |
| 3841.                 | All            | Psychoanalysis                                                    |
| XaA8V                 | All            | Generic psychoanalysis                                            |
| XaA8W                 | All            | Independent psychoanalysis                                        |
| XaA8T                 | All            | Kleinian psychoanalysis                                           |
| XaA8U                 | All            | Bion-based group psychoanalysis                                   |
| XaA8X                 | All            | Classical psychoanalysis                                          |
| XaA8Y                 | All            | Lacanian psychoanalysis                                           |
| XaA8g                 | All            | Group psychoanalysis                                              |
| XaA8U                 | All            | Bion-based group psychoanalysis                                   |
| 384Z.                 | All            | Psychological analysis NOS                                        |
| Xa8IM                 | All            | Jungian-based therapy                                             |

|       |     |                                                   |
|-------|-----|---------------------------------------------------|
| Xa8IN | All | Generic Jungian-based therapy                     |
| Xa8IP | All | Analytical psychology                             |
| Xa8IR | All | Long-term psychodynamic psychotherapy             |
| XaA8Z | All | Developmental psychodynamic psychotherapy         |
| XaA8c | All | Supportive expressive psychodynamic psychotherapy |
| XaA8d | All | Psychodynamic-interpersonal psychotherapy         |
| XaEVq | All | Psychodynamic psychotherapy                       |
| Xad7C | All | Focal psychodynamic therapy                       |
| Xa8IR | All | Long-term psychodynamic psychotherapy             |
| XaA8Z | All | Developmental psychodynamic psychotherapy         |
| XaA8c | All | Supportive expressive psychodynamic psychotherapy |
| XaA8d | All | Psychodynamic-interpersonal psychotherapy         |
| Xa8II | All | Short-term psychodynamic therapy                  |
| XaXuc | All | Dynamic interpersonal therapy                     |
| XaA9g | All | Specific task orientated psychotherapy            |
| XE0iL | All | Psychotherapy/sociotherapy                        |
| 8G9Z. | All | Other psychotherapy NOS                           |
| 8G9.. | All | Other psychotherapy                               |

**sTable 7. Medications analysed by medication class. SSRI = selective serotonin reuptake inhibitors, TCA = tricyclic antidepressants, MAOI = monoamine oxidase inhibitors, 5ASA = 5-aminosalicylic acid.**

| Medication class                                | Medications                                                                                                                            |
|-------------------------------------------------|----------------------------------------------------------------------------------------------------------------------------------------|
| <b>Medications for mental health conditions</b> |                                                                                                                                        |
| SSRIs and related medication                    | Venlafaxine, Bupropion, Duloxetine, Citalopram, Dapoxetine, Escitalopram, Fluoxetine, Fluvoxamine, Paroxetine, Sertraline              |
| TCA's                                           | Amitriptyline, Clomipramine, Dosulepin, Doxepin, Mianserin, Trazodone, Trimipramine, Imipramine, Lofepramine, Nortriptyline            |
| MAOIs                                           | Tranlycypromine, Phenelzine, Isocarboxazid, Moclobemide                                                                                |
| Anxiolytic medications                          | Alprazolam, Chlordiazepoxide, Clobazam, Clonazepam, Diazepam, Lorazepam, Oxazepam, Buspirone, Meprobamate, Clomipramine, Clomethiazole |
| <b>Medication for IBD</b>                       |                                                                                                                                        |
| Rectal 5-ASA                                    | Mesalazine, Sulfasalazine                                                                                                              |
| Rectal glucocorticoids                          | Budesonide, Hydrocortisone, Prednisolone                                                                                               |
| Oral 5-ASA                                      | Balsalazide, Mesalazine, Olsalazine, Sulfasalazine                                                                                     |
| Oral glucocorticoids                            | Prednisolone, Cortisone, Dexamethasone, Methylprednisolone, Beclomethasone, Betamethasone, Budesonide, Deflazacort                     |
| Antimetabolites                                 | Azathioprine, Cyclosporine, Mercaptopurine, Methotrexate, Tacrolimus                                                                   |
| Biologic therapies                              | Adalimumab, Golimumab, Infliximab, Vedolizumab                                                                                         |

sTable 8. The prevalence of common mental health conditions in people with Crohn's disease and ulcerative colitis by markers of disease severity.

|                                  | Anxiety episodes<br>n (%)           |                                 | Depressive episodes<br>n (%)        |                                 | Depressive disorder<br>n (%)        |                                 |
|----------------------------------|-------------------------------------|---------------------------------|-------------------------------------|---------------------------------|-------------------------------------|---------------------------------|
|                                  | Ulcerative<br>Colitis<br>(n=11,454) | Crohn's<br>Disease<br>(n=7,557) | Ulcerative<br>Colitis<br>(n=11,454) | Crohn's<br>Disease<br>(n=7,557) | Ulcerative<br>Colitis<br>(n=11,454) | Crohn's<br>Disease<br>(n=7,557) |
| <b>Duration of disease</b>       |                                     |                                 |                                     |                                 |                                     |                                 |
| <b>0-2 years</b>                 | 73 (2.8%)                           | 65 (4.0%)                       | 93 (3.6%)                           | 86 (5.3%)                       | 291 (11.2%)                         | 229 (14.2%)                     |
| <b>2-5 years</b>                 | 35 (2.4%)                           | 35 (3.6%)                       | 59 (4.1%)                           | 68 (7.0%)                       | 180 (12.5%)                         | 161 (16.5%)                     |
| <b>5-10 years</b>                | 50 (2.6%)                           | 37 (2.7%)                       | 86 (4.4%)                           | 73 (5.3%)                       | 267 (13.8%)                         | 223 (16.2%)                     |
| <b>10+ years</b>                 | 183 (3.3%)                          | 125 (3.5%)                      | 269 (4.9%)                          | 204 (5.7%)                      | 889 (16.2%)                         | 709 (19.7%)                     |
| <b>Current systemic therapy*</b> |                                     |                                 |                                     |                                 |                                     |                                 |
| <b>No</b>                        | 299 (3.1%)                          | 183 (3.6%)                      | 431 (4.4%)                          | 279 (5.5%)                      | 1413 (14.5%)                        | 914 (17.9%)                     |
| <b>Yes</b>                       | 42 (2.4%)                           | 79 (3.2%)                       | 76 (4.4%)                           | 152 (6.2%)                      | 214 (12.3%)                         | 408 (16.7%)                     |

\*defined as use of mercaptopurine, azathioprine, cyclosporine, methotrexate, tacrolimus, or biologic therapies

sTable 9. Healthcare resource use during three years of follow-up. Data are rates per person-year, with 95% confidence intervals

|                                                 | All Inflammatory bowel disease<br>n=19,011 | Ulcerative Colitis<br>n=11,454 | Crohn's disease<br>n=7,557 | Controls<br>n=76,044 |
|-------------------------------------------------|--------------------------------------------|--------------------------------|----------------------------|----------------------|
| <b>Primary care visits</b>                      | 6.41 (6.39-6.44)                           | 6.18 (6.15, 6.20)              | 6.78 (6.75, 6.82)          | 4.49 (4.48, 4.50)    |
| <b>Secondary care emergency attendances</b>     | 0.455 (0.449, 0.461)                       | 0.396 (0.389, 0.403)           | 0.546 (0.536, 0.557)       | 0.259 (0.257, 0.262) |
| <b>Fitness for work notes</b>                   | 0.311 (0.306, 0.316)                       | 0.270 (0.265, 0.276)           | 0.378 (0.368, 0.386)       | 0.215 (0.213, 0.217) |
| <b>Medications for mental health conditions</b> |                                            |                                |                            |                      |
| Selective serotonin reuptake inhibitors (SSRIs) | 1.328 (1.317, 1.338)                       | 1.218 (1.205, 1.230)           | 1.495 (1.478, 1.512)       | 1.046 (1.041, 1.050) |
| Anxiolytic medications                          | 0.219 (0.214, 0.223)                       | 0.189 (0.183, 0.194)           | 0.264 (0.257, 0.272)       | 0.166 (0.164, 0.168) |



sTable 10. Medication use in people with inflammatory bowel disease during three years of follow-up

| Medications for IBD           | All Inflammatory bowel disease<br>n=19,011 |                                    | Ulcerative Colitis<br>n=11,454       |                                    | Crohn's disease<br>n=7,557           |                                    |
|-------------------------------|--------------------------------------------|------------------------------------|--------------------------------------|------------------------------------|--------------------------------------|------------------------------------|
|                               | N (%) with at least one prescription       | Rate per 100 person years (95% CI) | N (%) with at least one prescription | Rate per 100 person years (95% CI) | N (%) with at least one prescription | Rate per 100 person years (95% CI) |
| Rectal 5-ASA                  | 3102 (16.3)                                | 36.1 (35.6, 36.7)                  | 2772 (24.2)                          | 53.4 (52.6, 54.3)                  | 330 (4.4)                            | 9.8 (9.3, 10.3)                    |
| Rectal glucocorticoids        | 2164 (11.4)                                | 16.1 (15.8, 16.5)                  | 1808 (15.8)                          | 23.3 (22.8, 23.9)                  | 356 (4.7)                            | 5.2 (4.8, 5.5)                     |
| Oral 5-ASA                    | 9640 (50.7)                                | 347 (345, 349)                     | 7046 (61.5)                          | 428 (426, 431)                     | 2594 (34.3)                          | 224 (222, 226)                     |
| Oral glucocorticoids          | 5876 (30.9)                                | 67.4 (66.7, 68.1)                  | 3374 (29.5)                          | 63.6 (62.7, 64.5)                  | 2502 (33.0)                          | 73.1 (72.0, 74.5)                  |
| Non-biologic immunomodulators | 3494 (22.6)                                | 141 (140, 142)                     | 1848 (16.1)                          | 104 (103, 105)                     | 2446 (32.3)                          | 196 (194, 198)                     |

**sTable 11. Full multivariable associations for patient features and measures of healthcare utilisation (A: primary care visits, B: Emergency secondary care visits, C: Fitness for work certificates) in people with IBD.**

Estimates are adjusted incidence rate ratios (IRR) with 95% confidence intervals. For each feature category, incidence rate ratios represent the relative change in rate of the healthcare utilisation measure compared to the reference category. An IRR greater than 1 indicates that the presence of a feature category is associated with an increased rate of healthcare utilisation.

**A) Primary care visits**

|                                      | <b>IBD</b>        | <b>UC</b>         | <b>CD</b>         |
|--------------------------------------|-------------------|-------------------|-------------------|
| <b>N</b>                             | 19,011            | 7,557             | 11,454            |
| <b>Mental health conditions</b>      |                   |                   |                   |
| Anxiety episodes                     | 1.36 (1.21, 1.52) | 1.30 (1.13, 1.51) | 1.42 (1.19, 1.68) |
| Depressive episodes                  | 1.04 (0.93, 1.17) | 0.99 (0.84, 1.16) | 1.11 (0.96, 1.29) |
| Depressive disorder                  | 1.32 (1.22, 1.43) | 1.41 (1.25, 1.60) | 1.21 (1.12, 1.30) |
| <b>Age at study entry</b>            |                   |                   |                   |
| 18 to 30                             | 1.00 (ref)        | 1.00 (ref)        | 1.00 (ref)        |
| 30 to 40                             | 0.87 (0.81, 0.94) | 0.93 (0.84, 1.03) | 0.83 (0.75, 0.92) |
| 40 to 50                             | 0.86 (0.80, 0.92) | 0.88 (0.80, 0.98) | 0.86 (0.77, 0.95) |
| 50 to 60                             | 0.88 (0.81, 0.95) | 0.92 (0.83, 1.02) | 0.87 (0.78, 0.97) |
| 60 to 70                             | 1.05 (0.97, 1.14) | 1.15 (1.03, 1.27) | 1.01 (0.90, 1.13) |
| 70 or older                          | 1.30 (1.19, 1.42) | 1.41 (1.26, 1.57) | 1.25 (1.10, 1.42) |
| <b>Sex</b>                           |                   |                   |                   |
| Male                                 | 0.80 (0.77, 0.83) | 0.82 (0.78, 0.86) | 0.79 (0.75, 0.83) |
| Female                               | 1.00 (ref)        | 1.00 (ref)        | 1.00 (ref)        |
| <b>Duration of disease</b>           |                   |                   |                   |
| 0-2 years                            | 1.00 (ref)        | 1.00 (ref)        | 1.00 (ref)        |
| 2-5 years                            | 0.47 (0.44, 0.51) | 0.47 (0.42, 0.53) | 0.48 (0.43, 0.53) |
| 5-10 years                           | 0.46 (0.43, 0.49) | 0.45 (0.41, 0.50) | 0.48 (0.43, 0.53) |
| 10+ years                            | 0.46 (0.43, 0.49) | 0.44 (0.40, 0.49) | 0.49 (0.45, 0.53) |
| <b>Current systemic therapy</b>      |                   |                   |                   |
| No                                   | 1.00 (ref)        | 1.00 (ref)        | 1.00 (ref)        |
| Yes                                  | 1.23 (1.18, 1.28) | 1.23 (1.16, 1.31) | 1.17 (1.11, 1.24) |
| <b>BMI(kg/m<sup>2</sup>)</b>         |                   |                   |                   |
| Underweight (<=18.5)                 | 1.01 (0.91, 1.12) | 0.96 (0.84, 1.11) | 1.01 (0.88, 1.17) |
| Normal Weight (18.5-25)              | 1.00 (ref)        | 1.00 (ref)        | 1.00 (ref)        |
| Overweight (25-30)                   | 1.02 (0.98, 1.06) | 0.98 (0.92, 1.03) | 1.09 (1.03, 1.16) |
| Obese (>=30)                         | 1.11 (1.06, 1.17) | 1.08 (1.01, 1.16) | 1.15 (1.08, 1.24) |
| <b>Smoking status</b>                |                   |                   |                   |
| Non-smoker                           | 1.00 (ref)        | 1.00 (ref)        | 1.00 (ref)        |
| Current Smoker                       | 1.13 (1.07, 1.19) | 1.20 (1.11, 1.29) | 1.03 (0.96, 1.10) |
| Ex-smoker                            | 1.08 (1.04, 1.12) | 1.10 (1.05, 1.15) | 1.04 (0.98, 1.11) |
| <b>Index of multiple deprivation</b> |                   |                   |                   |
| 1 (most deprived)                    | 1.00 (ref)        | 1.00 (ref)        | 1.00 (ref)        |
| 2                                    | 0.93 (0.87, 0.99) | 0.93 (0.85, 1.02) | 0.92 (0.84, 1.00) |
| 3                                    | 0.92 (0.86, 0.97) | 0.95 (0.87, 1.03) | 0.87 (0.80, 0.94) |
| 4                                    | 0.96 (0.90, 1.04) | 0.99 (0.88, 1.10) | 0.93 (0.86, 1.01) |
| 5 (least deprived)                   | 0.92 (0.86, 0.98) | 0.88 (0.81, 0.96) | 0.98 (0.89, 1.07) |
| <b>Comorbidities</b>                 |                   |                   |                   |
| Type 2 Diabetes                      | 1.39 (1.28, 1.51) | 1.50 (1.35, 1.67) | 1.18 (1.06, 1.30) |
| Hypertension                         | 1.14 (1.09, 1.19) | 1.13 (1.06, 1.19) | 1.16 (1.08, 1.25) |
| Atrial Fibrillation                  | 1.54 (1.27, 1.87) | 1.60 (1.25, 2.05) | 1.36 (1.16, 1.60) |
| Angina                               | 1.10 (0.97, 1.26) | 1.07 (0.90, 1.27) | 1.20 (1.03, 1.39) |
| Myocardial Infarction                | 1.03 (0.90, 1.19) | 1.05 (0.87, 1.27) | 0.97 (0.83, 1.13) |
| Stroke                               | 1.00 (0.88, 1.13) | 0.99 (0.84, 1.16) | 1.03 (0.90, 1.19) |
| Heart Failure                        | 1.41 (0.89, 2.24) | 1.64 (0.85, 3.16) | 1.04 (0.85, 1.27) |
| Chronic Liver Disease                | 1.30 (1.14, 1.47) | 1.26 (1.10, 1.45) | 1.40 (1.12, 1.76) |

|                      | <b>IBD</b>        | <b>UC</b>         | <b>CD</b>         |
|----------------------|-------------------|-------------------|-------------------|
| Dementia             | 1.18 (0.96, 1.45) | 1.24 (0.94, 1.64) | 1.06 (0.92, 1.21) |
| Rheumatoid Arthritis | 1.30 (1.11, 1.52) | 1.33 (1.09, 1.62) | 1.29 (1.03, 1.62) |
| Asthma               | 1.21 (1.15, 1.27) | 1.20 (1.13, 1.28) | 1.21 (1.14, 1.30) |

IBD model intercept = 11.08; IMD missing category IRR 1.29 (1.12, 1.48); BMI missing category IRR 0.85 (0.79, 0.91); Smoking status missing category IRR 1.81 (1.46, 2.24)

UC model intercept = 10.14; IMD missing category IRR 1.36 (1.12, 1.66); BMI missing category IRR 0.83 (0.75, 0.91); Smoking status missing category IRR 1.78 (1.32, 2.39).

CD model intercept = 12.16; IMD missing category IRR 1.18 (0.96, 1.46); BMI missing category IRR 0.88 (0.80, 0.98); Smoking status missing category IRR 1.83 (1.34, 2.50)

**B) Emergency secondary care visits**

|                                      | <b>IBD</b>        | <b>UC</b>         | <b>CD</b>         |
|--------------------------------------|-------------------|-------------------|-------------------|
| <b>N</b>                             | 19,011            | 7,557             | 11,454            |
| <b>Mental health conditions</b>      |                   |                   |                   |
| Anxiety episodes                     | 1.01 (0.93, 1.09) | 0.98 (0.88, 1.11) | 1.05 (0.94, 1.17) |
| Depressive episodes                  | 1.02 (0.95, 1.09) | 0.96 (0.86, 1.06) | 1.04 (0.95, 1.14) |
| Depressive disorder                  | 1.22 (1.17, 1.27) | 1.34 (1.27, 1.42) | 1.11 (1.05, 1.18) |
| <b>Age at study entry</b>            |                   |                   |                   |
| 18 to 30                             | 1.00 (ref)        | 1.00 (ref)        | 1.00 (ref)        |
| 30 to 40                             | 0.75 (0.70, 0.79) | 0.75 (0.69, 0.82) | 0.75 (0.69, 0.81) |
| 40 to 50                             | 0.71 (0.67, 0.75) | 0.67 (0.61, 0.74) | 0.75 (0.70, 0.81) |
| 50 to 60                             | 0.75 (0.70, 0.79) | 0.64 (0.59, 0.71) | 0.87 (0.81, 0.94) |
| 60 to 70                             | 0.78 (0.74, 0.83) | 0.78 (0.71, 0.86) | 0.82 (0.76, 0.89) |
| 70 or older                          | 0.95 (0.89, 1.01) | 1.11 (1.02, 1.22) | 0.83 (0.76, 0.91) |
| <b>Sex</b>                           |                   |                   |                   |
| Male                                 | 0.98 (0.95, 1.01) | 1.07 (1.03, 1.12) | 0.93 (0.89, 0.97) |
| Female                               | 1.00 (ref)        | 1.00 (ref)        | 1.00 (ref)        |
| <b>Duration of disease</b>           |                   |                   |                   |
| 0-2 years                            | 1.00 (ref)        | 1.00 (ref)        | 1.00 (ref)        |
| 2-5 years                            | 0.70 (0.67, 0.74) | 0.69 (0.64, 0.74) | 0.70 (0.65, 0.75) |
| 5-10 years                           | 0.68 (0.65, 0.71) | 0.66 (0.62, 0.71) | 0.67 (0.62, 0.71) |
| 10+ years                            | 0.72 (0.69, 0.74) | 0.63 (0.60, 0.67) | 0.78 (0.74, 0.83) |
| <b>Current systemic therapy</b>      |                   |                   |                   |
| No                                   | 1.00 (ref)        | 1.00 (ref)        | 1.00 (ref)        |
| Yes                                  | 1.22 (1.18, 1.26) | 1.14 (1.08, 1.21) | 1.17 (1.12, 1.22) |
| <b>BMI(kg/m<sup>2</sup>)</b>         |                   |                   |                   |
| Underweight (<=18.5)                 | 1.18 (1.10, 1.26) | 1.13 (1.01, 1.26) | 1.22 (1.11, 1.34) |
| Normal Weight (18.5-25)              | 1.00 (ref)        | 1.00 (ref)        | 1.00 (ref)        |
| Overweight (25-30)                   | 0.97 (0.94, 1.01) | 0.92 (0.88, 0.97) | 1.03 (0.97, 1.08) |
| Obese (>=30)                         | 1.09 (1.04, 1.13) | 1.04 (0.98, 1.10) | 1.17 (1.11, 1.24) |
| <b>Smoking status</b>                |                   |                   |                   |
| Non-smoker                           | 1.00 (ref)        | 1.00 (ref)        | 1.00 (ref)        |
| Current Smoker                       | 1.15 (1.10, 1.20) | 1.05 (0.97, 1.12) | 1.15 (1.08, 1.22) |
| Ex-smoker                            | 0.95 (0.91, 0.98) | 0.95 (0.90, 0.99) | 0.93 (0.88, 0.98) |
| <b>Index of multiple deprivation</b> |                   |                   |                   |
| 1 (most deprived)                    | 1.00 (ref)        | 1.00 (ref)        | 1.00 (ref)        |
| 2                                    | 0.86 (0.81, 0.90) | 0.87 (0.81, 0.93) | 0.84 (0.78, 0.90) |
| 3                                    | 0.86 (0.82, 0.90) | 0.81 (0.76, 0.87) | 0.90 (0.84, 0.96) |
| 4                                    | 0.85 (0.81, 0.89) | 0.82 (0.76, 0.87) | 0.88 (0.82, 0.94) |
| 5 (least deprived)                   | 0.80 (0.76, 0.84) | 0.75 (0.70, 0.80) | 0.86 (0.80, 0.92) |
| <b>Comorbidities</b>                 |                   |                   |                   |
| Type 2 Diabetes                      | 1.06 (1.01, 1.11) | 1.14 (1.08, 1.21) | 0.94 (0.88, 1.02) |
| Hypertension                         | 1.07 (1.03, 1.11) | 1.01 (0.96, 1.07) | 1.11 (1.04, 1.17) |
| Atrial Fibrillation                  | 1.28 (1.20, 1.36) | 1.35 (1.26, 1.46) | 1.14 (1.02, 1.27) |
| Angina                               | 1.36 (1.28, 1.45) | 1.06 (0.98, 1.16) | 1.97 (1.79, 2.17) |
| Myocardial Infarction                | 1.03 (0.95, 1.11) | 1.20 (1.09, 1.32) | 0.83 (0.73, 0.94) |
| Stroke                               | 1.48 (1.38, 1.59) | 1.61 (1.47, 1.77) | 1.31 (1.17, 1.47) |
| Heart Failure                        | 1.29 (1.19, 1.39) | 1.16 (1.04, 1.29) | 1.52 (1.34, 1.73) |
| Chronic Liver Disease                | 1.40 (1.30, 1.51) | 1.63 (1.47, 1.80) | 1.14 (1.01, 1.28) |
| Dementia                             | 1.14 (1.07, 1.22) | 1.11 (1.02, 1.21) | 1.23 (1.10, 1.37) |
| Rheumatoid Arthritis                 | 1.05 (0.95, 1.15) | 1.18 (1.04, 1.33) | 0.93 (0.80, 1.08) |
| Asthma                               | 1.18 (1.14, 1.22) | 1.11 (1.06, 1.17) | 1.24 (1.19, 1.30) |

IBD model intercept = 1.52; IMD missing category IRR 0.79 (0.70, 0.89); BMI missing category IRR 1.03 (0.96, 1.09); Smoking status missing category IRR 1.24 (1.08, 1.44). UC model intercept = 1.52; IMD missing category IRR 0.80 (0.68, 0.94); BMI missing category IRR 0.90 (0.82, 0.99); Smoking status missing category IRR 1.84 (1.50, 2.26). CD model intercept = 1.57; IMD missing category IRR 0.80 (0.67, 0.94); BMI missing category IRR 1.17 (1.07, 1.28); Smoking status missing category IRR 0.94 (0.77, 1.15)

## C) Fitness for work certificates

|                                      | IBD               | UC                | CD                |
|--------------------------------------|-------------------|-------------------|-------------------|
| N                                    | 19,011            | 7,557             | 11,454            |
| <b>Mental health conditions</b>      |                   |                   |                   |
| Anxiety episodes                     | 1.28 (1.18, 1.39) | 1.38 (1.24, 1.53) | 1.16 (1.02, 1.32) |
| Depressive episodes                  | 0.98 (0.91, 1.06) | 1.00 (0.91, 1.11) | 1.00 (0.90, 1.12) |
| Depressive disorder                  | 1.29 (1.24, 1.35) | 1.31 (1.23, 1.40) | 1.24 (1.16, 1.33) |
| <b>Age at study entry</b>            |                   |                   |                   |
| 18 to 30                             | 1.00 (ref)        | 1.00 (ref)        | 1.00 (ref)        |
| 30 to 40                             | 0.93 (0.87, 0.98) | 0.92 (0.83, 1.00) | 0.94 (0.87, 1.02) |
| 40 to 50                             | 0.92 (0.87, 0.98) | 0.93 (0.85, 1.02) | 0.92 (0.85, 1.00) |
| 50 to 60                             | 1.04 (0.98, 1.11) | 1.08 (0.99, 1.19) | 1.00 (0.92, 1.09) |
| 60 to 70                             | 1.00 (0.93, 1.09) | 1.06 (0.94, 1.18) | 0.96 (0.85, 1.08) |
| 70 or older                          | 0.69 (0.49, 0.97) | 0.66 (0.44, 0.98) | 0.56 (0.26, 1.19) |
| <b>Sex</b>                           |                   |                   |                   |
| Male                                 | 1.00 (0.97, 1.04) | 1.05 (1.00, 1.10) | 0.96 (0.92, 1.02) |
| Female                               | 1.00 (ref)        | 1.00 (ref)        | 1.00 (ref)        |
| <b>Duration of disease</b>           |                   |                   |                   |
| 0-2 years                            | 1.00 (ref)        | 1.00 (ref)        | 1.00 (ref)        |
| 2-5 years                            | 0.71 (0.68, 0.75) | 0.75 (0.70, 0.81) | 0.66 (0.61, 0.71) |
| 5-10 years                           | 0.70 (0.66, 0.74) | 0.68 (0.63, 0.73) | 0.72 (0.67, 0.78) |
| 10+ years                            | 0.64 (0.61, 0.67) | 0.63 (0.59, 0.67) | 0.65 (0.61, 0.69) |
| <b>Current systemic therapy</b>      |                   |                   |                   |
| No                                   | 1.00 (ref)        | 1.00 (ref)        | 1.00 (ref)        |
| Yes                                  | 1.04 (1.00, 1.08) | 1.09 (1.03, 1.16) | 1.00 (0.95, 1.05) |
| <b>BMI(kg/m<sup>2</sup>)</b>         |                   |                   |                   |
| Underweight (<=18.5)                 | 0.96 (0.87, 1.07) | 0.89 (0.75, 1.05) | 1.01 (0.89, 1.15) |
| Normal Weight (18.5-25)              | 1.00 (ref)        | 1.00 (ref)        | 1.00 (ref)        |
| Overweight (25-30)                   | 1.10 (1.06, 1.15) | 1.12 (1.05, 1.19) | 1.09 (1.02, 1.16) |
| Obese (>=30)                         | 1.13 (1.08, 1.19) | 1.12 (1.05, 1.20) | 1.13 (1.05, 1.21) |
| <b>Smoking status</b>                |                   |                   |                   |
| Non-smoker                           | 1.00 (ref)        | 1.00 (ref)        | 1.00 (ref)        |
| Current Smoker                       | 1.24 (1.19, 1.30) | 1.25 (1.16, 1.34) | 1.23 (1.15, 1.31) |
| Ex-smoker                            | 1.09 (1.05, 1.14) | 1.15 (1.08, 1.21) | 1.04 (0.97, 1.10) |
| <b>Index of multiple deprivation</b> |                   |                   |                   |
| 1 (most deprived)                    | 1.00 (ref)        | 1.00 (ref)        | 1.00 (ref)        |
| 2                                    | 0.97 (0.92, 1.02) | 0.85 (0.79, 0.91) | 1.11 (1.03, 1.20) |
| 3                                    | 0.87 (0.82, 0.92) | 0.84 (0.78, 0.90) | 0.91 (0.84, 0.98) |
| 4                                    | 0.83 (0.79, 0.88) | 0.75 (0.69, 0.81) | 0.92 (0.85, 1.00) |
| 5 (least deprived)                   | 0.76 (0.72, 0.80) | 0.71 (0.66, 0.77) | 0.80 (0.74, 0.87) |
| <b>Comorbidities</b>                 |                   |                   |                   |
| Type 2 Diabetes                      | 1.21 (1.12, 1.30) | 1.16 (1.06, 1.28) | 1.30 (1.15, 1.47) |
| Hypertension                         | 0.99 (0.94, 1.05) | 1.08 (1.00, 1.16) | 0.88 (0.81, 0.97) |
| Atrial Fibrillation                  | 1.02 (0.84, 1.23) | 1.12 (0.87, 1.44) | 1.00 (0.74, 1.34) |
| Angina                               | 1.12 (0.93, 1.34) | 0.75 (0.57, 0.99) | 1.93 (1.50, 2.49) |
| Myocardial Infarction                | 0.86 (0.71, 1.05) | 0.63 (0.46, 0.85) | 1.23 (0.95, 1.59) |
| Stroke                               | 0.80 (0.67, 0.97) | 0.95 (0.72, 1.24) | 0.63 (0.48, 0.83) |
| Heart Failure                        | 1.08 (0.84, 1.39) | 1.09 (0.80, 1.49) | 1.44 (0.94, 2.22) |
| Chronic Liver Disease                | 1.11 (1.00, 1.24) | 1.18 (1.02, 1.36) | 1.02 (0.85, 1.22) |
| Dementia                             | 1.29 (1.11, 1.49) | 1.33 (1.10, 1.60) | 1.26 (1.00, 1.60) |
| Rheumatoid Arthritis                 | 1.14 (0.98, 1.32) | 1.23 (1.02, 1.48) | 1.04 (0.79, 1.36) |
| Asthma                               | 1.06 (1.02, 1.10) | 1.03 (0.97, 1.09) | 1.09 (1.03, 1.15) |

IBD model intercept = 1.76; IMD missing category IRR 0.75 (0.66, 0.85); BMI missing category IRR 1.07 (0.99, 1.15); Smoking status missing category IRR 1.04 (0.84, 1.28). UC model intercept = 1.72; IMD missing category IRR 0.76 (0.64, 0.91); BMI missing category IRR 0.98 (0.89, 1.10); Smoking status missing category IRR 1.29 (0.92, 1.80). CD model intercept = 1.82; IMD missing category IRR 0.73 (0.61, 0.88); BMI missing category IRR 1.15 (1.04, 1.27); Smoking status missing category IRR 0.91 (0.69, 1.21)
